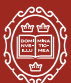

**OXFORD JOURNALS**  
OXFORD UNIVERSITY PRESS

[www.past.oxfordjournals.org](http://www.past.oxfordjournals.org)

ISBN 978-0-19-956137-7

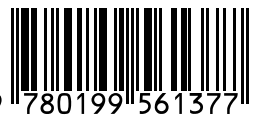

9 780199 561377
